# Supplementary material for: Weight Cycling Increases Longevity Compared with Sustained Obesity in Mice
Source: PubMed Central journal article supplement (PMC6221135; doi:10.1002/oby.22290), 2018-10-25
Supplement: OBY-26-1733-s001.pdf [file OBY-26-1733-s001.pdf]

**Figure S1.** Body composition. Body composition as measured by QMR (mean±SD) post-randomization by group including wave 1 female (A, D, G) and male (B, E, H), and wave 2 male (C, F, I). Body fat mass as measured by QMR at subsequent loss cycle (post-randomization wk ~41; A-C;  $p < 0.01$  all groups vs. EO except (C) OWLM vs. EO,  $p = 0.76$ ) and lean mass following initial weight loss (T1 wk~13; D-F;  $p < 0.01$  all groups vs. EO) and regain by the WC group (T2 wk~29; D-F inset;  $p < 0.01$  except (D) inset EO vs. WC,  $p = 0.923$ ) and subsequent loss cycle (post-randomization wk ~41; G-I;  $p < 0.01$  all groups vs. EO) EO=Ever Obese (black), OWLM=Obese Weight Losers Moderate (red), OWL=Obese Weight Losers (blue), WC=Weight Cyclers (yellow).

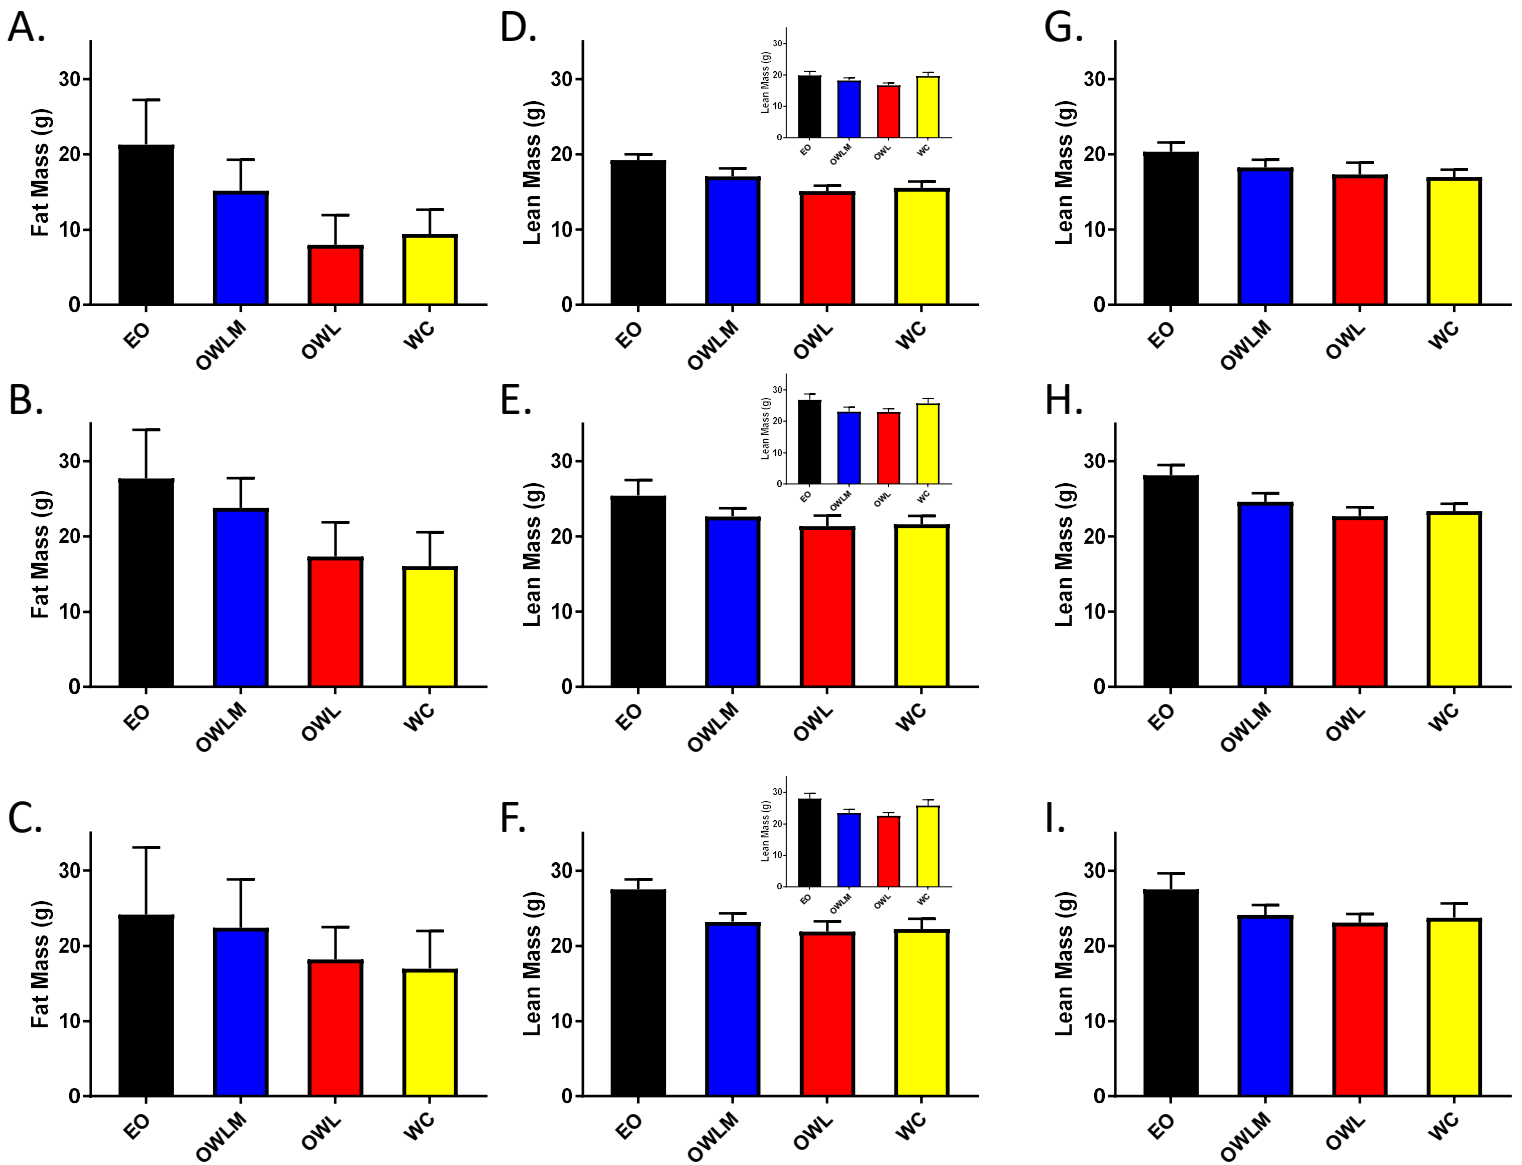

**Figure S2.** Adipose depot mass measured at dissection. Depot specific mass (mean $\pm$ SD) for individual fat pads by sex (male: A,C; female: B,D) and age (initial weight loss: A,B, 50% survival: C,D) as measured at time of dissection. For analyses of significance among groups see **Table S2.**

## Supplemental Figure 2

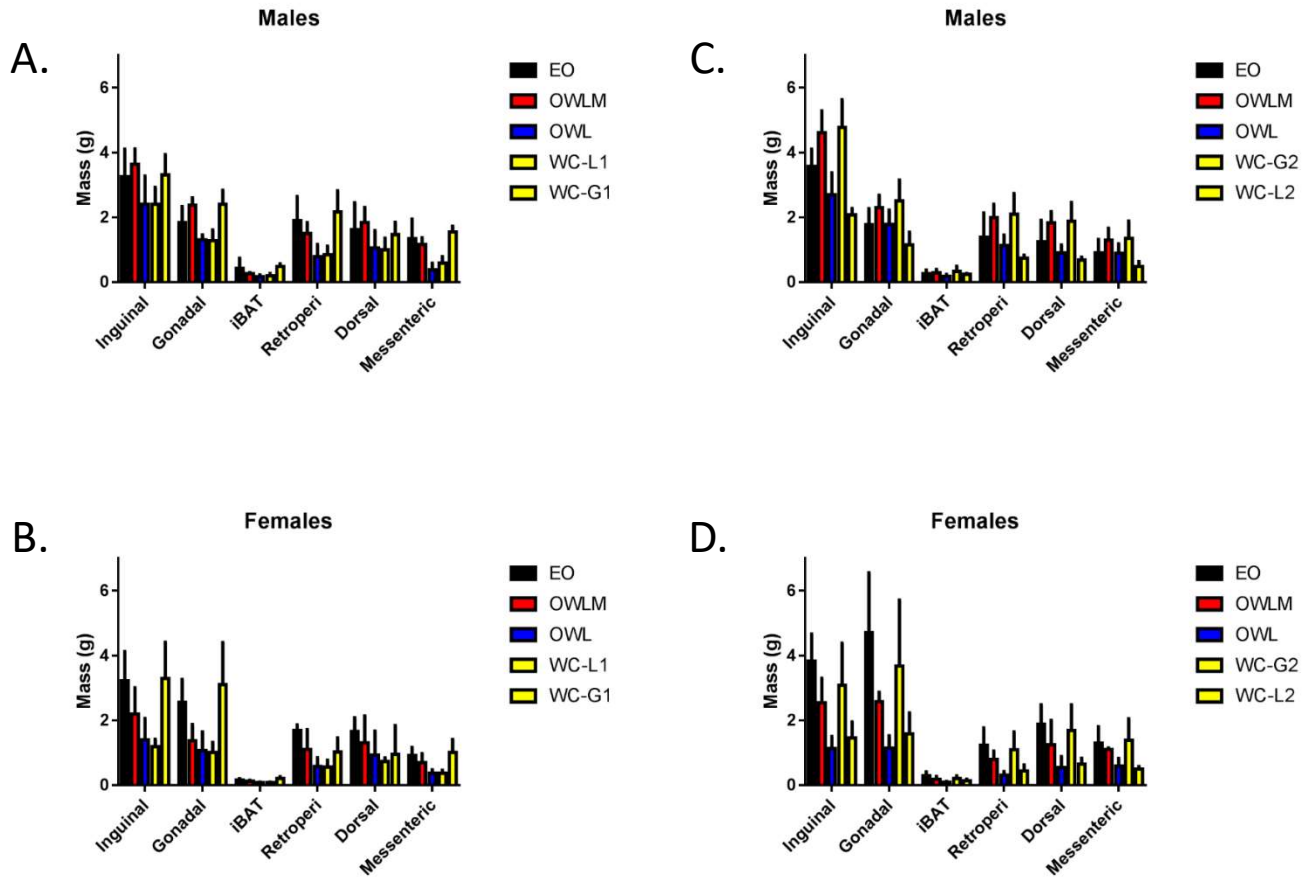

**Figure S3.** Adipocyte cell size as measured by osmium tetroxide fixation. Adipocyte cell size (mean±SD) for gonadal (A-B, E-F) or inguinal (C-D, G-H) depots presented by sex (female-A, C, E, G and male- B, D, F, H) after initial weight loss (T1 – 1<sup>st</sup>) or mid-life collections (T3 – 2<sup>nd</sup>). Weight loss or regain by WC group shown (WC-L or WC-G; T2 and T4). Statistical results for group comparisons versus EO within a tissue at the specified time point (males and females combined) using GLM by group, adjusted for sex.

Figure S3

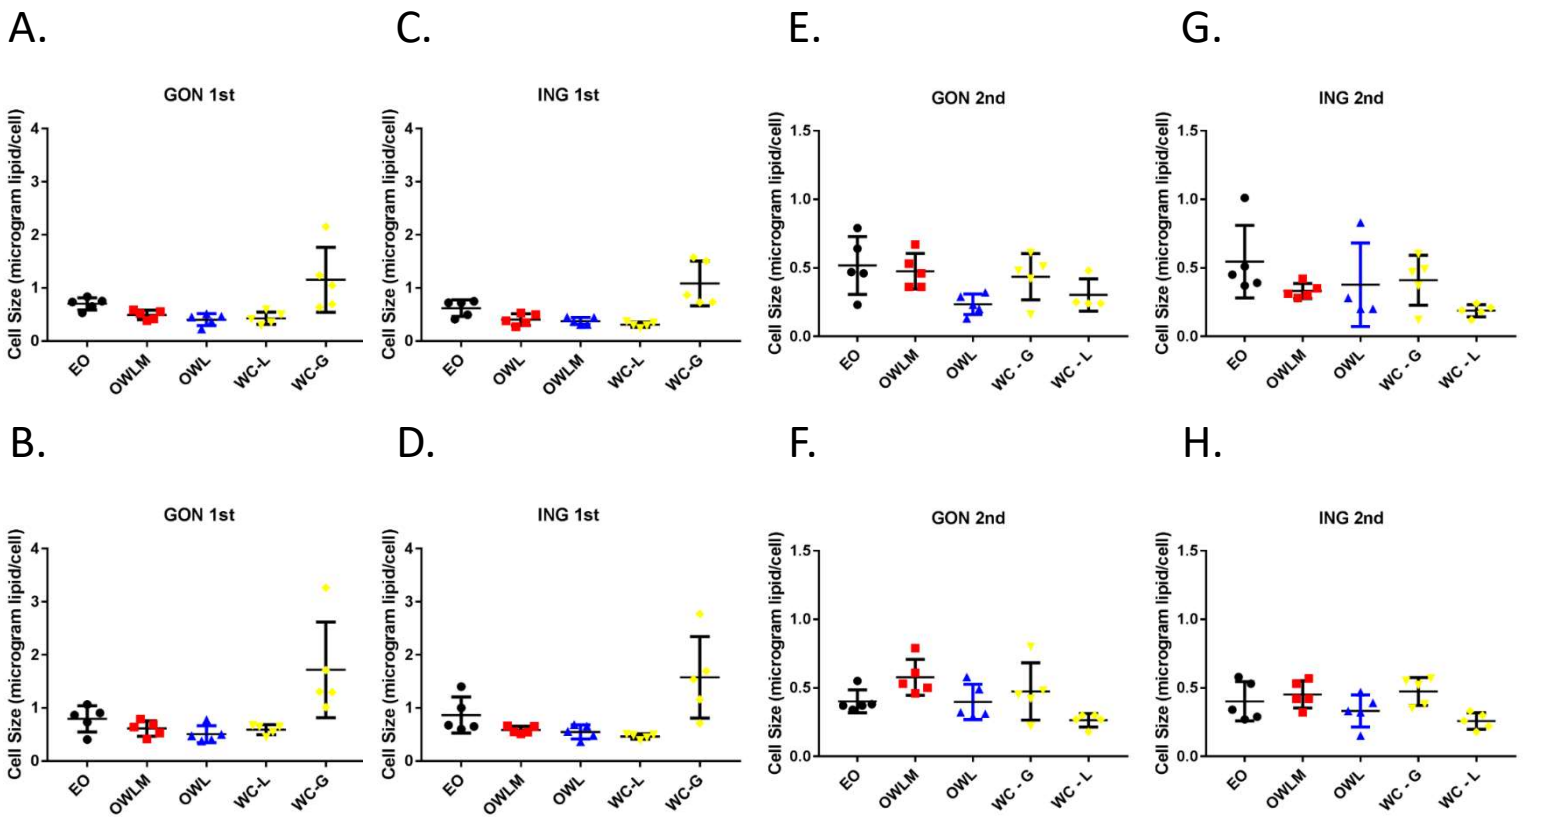

| Comparison (EO vs.) | t-statistic | p-value         | Tukey adjusted  | Comparison (EO vs.) | t-statistic | p-value         | Tukey adjusted  | Comparison (EO vs.) | t-statistic | p-value      | Tukey adjusted | Comparison (EO vs.) | t-statistic | p-value | Tukey adjusted |
|---------------------|-------------|-----------------|-----------------|---------------------|-------------|-----------------|-----------------|---------------------|-------------|--------------|----------------|---------------------|-------------|---------|----------------|
| OWLM                | -3.15       | <b>0.003</b>    | <b>0.017</b>    | OWLM                | -4.01       | <b>&lt;.001</b> | <b>0.002</b>    | OWLM                | 0.97        | 0.337        | 0.765          | OWLM                | -1.06       | 0.298   | 0.718          |
| OWL                 | -4.75       | <b>&lt;.001</b> | <b>&lt;.001</b> | OWL                 | -4.08       | <b>&lt;.001</b> | <b>0.001</b>    | OWL                 | -2.09       | <b>0.044</b> | 0.175          | OWL                 | -1.53       | 0.136   | 0.433          |
| WC                  | -3.86       | <b>0.001</b>    | <b>0.003</b>    | WC                  | -5.47       | <b>&lt;.001</b> | <b>&lt;.001</b> | WC                  | -0.07       | 0.943        | 0.999          | WC                  | -0.41       | 0.683   | 0.976          |
