# Supplementary material for: Weight Cycling Increases Longevity Compared with Sustained Obesity in Mice
Source: PubMed Central journal article supplement (PMC6221135; doi:10.1002/oby.22290), 2018-10-25
Supplement: OBY-26-1733-s002.pdf [file OBY-26-1733-s002.pdf]

Table S1. Diet Composition

|                                   | D12450B <sup>#¥</sup> |             | D12451 <sup>#¥</sup> |             | D11022101 <sup>#¥†</sup> |             | D11112301 <sup>#¥§</sup> |             |
|-----------------------------------|-----------------------|-------------|----------------------|-------------|--------------------------|-------------|--------------------------|-------------|
|                                   | gm%                   | kcal%       | gm%                  | kcal%       | gm                       | kcal        | gm%                      | kcal%       |
| Protein                           | 19.2                  | 20.0        | 23.7                 | 20.0        | 22                       | 20          | 23.7                     | 20.0        |
| Carbohydrate                      | 67.3                  | 70.0        | 41.4                 | 35.1        | 40                       | 35          | 40.3                     | 34.1        |
| Fat                               | 4.3                   | 10.0        | 23.6                 | 44.9        | 22                       | 45          | 23.6                     | 44.9        |
| Total                             |                       | 100.0       |                      | 100.0       |                          | 100         |                          | 99.0        |
| kcal/gm                           | 3.85                  |             | 4.73                 |             | 4.5                      |             | 4.73                     |             |
| <b>Ingredient</b>                 | <b>gm</b>             | <b>kcal</b> | <b>gm</b>            | <b>kcal</b> | <b>gm</b>                | <b>kcal</b> | <b>gm</b>                | <b>kcal</b> |
| Casein, 80 Mesh                   | 200                   | 800         | 200                  | 800         | 200                      | 800         | 200                      | 800         |
| L-Cystine                         | 3                     | 12          | 3                    | 12          | 3                        | 12          | 3                        | 12          |
| Corn Starch                       | 315                   | 1260        | 72.8                 | 291.2       | 72.8                     | 291         | 72.8                     | 291.2       |
| Maltodextrin 10                   | 35                    | 140         | 100                  | 400         | 100                      | 400         | 100                      | 400         |
| Sucrose                           | 350                   | 1400        | 172.8                | 691.2       | 172.8                    | 691         | 172.8                    | 691.2       |
| Cellulose                         | 50                    | 0           | 50                   | 0           | 50                       | 0           | 50                       | 0           |
| Soybean Oil                       | 25                    | 225         | 25                   | 225         | 25                       | 225         | 25                       | 225         |
| Lard                              | 20                    | 180         | 177.5                | 1597.5      | 177.5                    | 1598        | 177.5                    | 1597.5      |
| Mineral Mix, S10026               | 10                    | 0           | 10                   | 0           | 0                        | 0           | 10                       | 0           |
| Mineral Mix S10026B (50 gm/kg)    |                       |             |                      |             | 83.5                     | 0           |                          |             |
| DiCalcium Phosphate               | 13                    | 0           | 13                   | 0           | 0                        | 0           | 13                       | 0           |
| Calcium Carbonate                 | 5.5                   | 0           | 5.5                  | 0           | 0                        | 0           | 5.5                      | 0           |
| Potassium Citrate, 1 H2O          | 16.5                  | 0           | 16.5                 | 0           | 0                        | 0           | 16.5                     | 0           |
| Vitamin Mix, V10001               | 10                    | 40          | 10                   | 40          | 16.7                     | 67          | 0                        | 0           |
| V13001 (w/o Vit A)                | 0                     | 0           | 0                    | 0           |                          |             | 10                       | 40          |
| Vitamin A Acetate (500,000 IU/gm) | 0                     | 0           | 0                    | 0           |                          |             | 0.0035                   | 0           |
| Choline Bitartrate                | 2                     | 0           | 2                    | 0           | 2                        | 0           | 2                        | 0           |
| FD&C Yellow Dye #5                | 0.05                  | 0           | 0                    | 0           | 0                        | 0           | 0.025                    | 0           |
| FD&C Red Dye #40                  | 0                     | 0           | 0.05                 | 0           | 0                        | 0           | 0                        | 0           |
| FD&C Blue Dye #1                  | 0                     | 0           | 0                    | 0           | 0.05                     | 0           | 0.025                    | 0           |
| <b>Total</b>                      | <b>1055.05</b>        | <b>4057</b> | <b>858.15</b>        | <b>4057</b> | <b>903.35</b>            | <b>4084</b> | <b>858.15</b>            | <b>4057</b> |
| Vitamin A (IU/4057 kcals)         | 4074                  |             | 4338                 |             | n.d.*                    |             | 2088                     |             |
| Vitamin A (IU/kg)                 | 3861                  |             | 5055                 |             | n.d.*                    |             | 2433                     |             |

<sup>#</sup>Product Number

<sup>¥</sup>Research Diets, Inc., New Brunswick NJ, USA

<sup>§</sup>Rodent Diet With 45 kcal% Fat and Same With 67% Added Vitamins and Minerals

<sup>†</sup>Rodent Diet with 45 kcal% Fat and Reduced Vitamin A to NRC Value (2,400 IU / kg). Vitamin A calculated as 4,000 IU per 10 gm V10001, 168 IU / 100 gm Lard, and 20 IU / 100 gm Casein; Vitamin A should be assayed for accuracy.

\*n.d. - not determined

**Table S2. Adipose depot mass comparisons at specified time points.**

| Outcome     | Time point | Comparison  | p-value          | FDR              |
|-------------|------------|-------------|------------------|------------------|
| Dorsal      | 1 & 2      | all Groups  | <b>0.019</b>     | <b>0.033</b>     |
| Dorsal      | 1 & 2      | EO vs OWL   | <b>0.020</b>     | <b>0.034</b>     |
| Dorsal      | 1 & 2      | EO vs OWLM  | 0.811            | 0.860            |
| Dorsal      | 1 & 2      | EO vs WC_G1 | 0.117            | 0.164            |
| Dorsal      | 1 & 2      | EO vs WC_L1 | <b>0.006</b>     | <b>0.011</b>     |
| Dorsal      | 3 & 4      | all Groups  | <b>&lt;0.001</b> | <b>&lt;0.001</b> |
| Dorsal      | 3 & 4      | EO vs OWL   | <b>0.001</b>     | <b>0.003</b>     |
| Dorsal      | 3 & 4      | EO vs OWLM  | 0.911            | 0.911            |
| Dorsal      | 3 & 4      | EO vs WC_G2 | 0.369            | 0.445            |
| Dorsal      | 3 & 4      | EO vs WC_L2 | <b>0.001</b>     | <b>0.002</b>     |
| Gonadal     | 1 & 2      | all Groups  | <b>&lt;0.001</b> | <b>&lt;0.001</b> |
| Gonadal     | 1 & 2      | EO vs OWL   | <b>0.001</b>     | <b>0.003</b>     |
| Gonadal     | 1 & 2      | EO vs OWLM  | 0.289            | 0.367            |
| Gonadal     | 1 & 2      | EO vs WC_G1 | 0.065            | 0.097            |
| Gonadal     | 1 & 2      | EO vs WC_L1 | <b>0.001</b>     | <b>0.002</b>     |
| Gonadal     | 3 & 4      | all Groups  | <b>0.001</b>     | <b>0.001</b>     |
| Gonadal     | 3 & 4      | EO vs OWL   | <b>0.001</b>     | <b>0.002</b>     |
| Gonadal     | 3 & 4      | EO vs OWLM  | 0.117            | 0.167            |
| Gonadal     | 3 & 4      | EO vs WC_G2 | 0.774            | 0.834            |
| Gonadal     | 3 & 4      | EO vs WC_L2 | <b>0.001</b>     | <b>0.002</b>     |
| iBAT        | 1 & 2      | all Groups  | <b>&lt;0.001</b> | <b>&lt;0.001</b> |
| iBAT        | 1 & 2      | EO vs OWL   | <b>0.001</b>     | <b>0.003</b>     |
| iBAT        | 1 & 2      | EO vs OWLM  | 0.055            | 0.086            |
| iBAT        | 1 & 2      | EO vs WC_G1 | 0.310            | 0.388            |
| iBAT        | 1 & 2      | EO vs WC_L1 | <b>0.003</b>     | <b>0.007</b>     |
| iBAT        | 3 & 4      | all Groups  | <b>0.012</b>     | <b>0.021</b>     |
| iBAT        | 3 & 4      | EO vs OWL   | <b>0.002</b>     | <b>0.005</b>     |
| iBAT        | 3 & 4      | EO vs OWLM  | 0.411            | 0.479            |
| iBAT        | 3 & 4      | EO vs WC_G2 | 0.888            | 0.901            |
| iBAT        | 3 & 4      | EO vs WC_L2 | 0.060            | 0.092            |
| Inguinal    | 1 & 2      | all Groups  | <b>&lt;0.001</b> | <b>&lt;0.001</b> |
| Inguinal    | 1 & 2      | EO vs OWL   | <b>&lt;0.001</b> | <b>0.001</b>     |
| Inguinal    | 1 & 2      | EO vs OWLM  | 0.372            | 0.441            |
| Inguinal    | 1 & 2      | EO vs WC_G1 | 0.859            | 0.884            |
| Inguinal    | 1 & 2      | EO vs WC_L1 | <b>&lt;0.001</b> | <b>0.001</b>     |
| Inguinal    | 3 & 4      | all Groups  | <b>&lt;0.001</b> | <b>&lt;0.001</b> |
| Inguinal    | 3 & 4      | EO vs OWL   | <b>&lt;0.001</b> | <b>&lt;0.001</b> |
| Inguinal    | 3 & 4      | EO vs OWLM  | 0.743            | 0.813            |
| Inguinal    | 3 & 4      | EO vs WC_G2 | 0.532            | 0.611            |
| Inguinal    | 3 & 4      | EO vs WC_L2 | <b>&lt;0.001</b> | <b>&lt;0.001</b> |
| Messenteric | 1 & 2      | all Groups  | <b>&lt;0.001</b> | <b>&lt;0.001</b> |
| Messenteric | 1 & 2      | EO vs OWL   | <b>&lt;0.001</b> | <b>&lt;0.001</b> |
| Messenteric | 1 & 2      | EO vs OWLM  | 0.150            | 0.202            |
| Messenteric | 1 & 2      | EO vs WC_G1 | 0.237            | 0.307            |
| Messenteric | 1 & 2      | EO vs WC_L1 | <b>&lt;0.001</b> | <b>&lt;0.001</b> |
| Messenteric | 3 & 4      | all Groups  | <b>&lt;0.001</b> | <b>&lt;0.001</b> |
| Messenteric | 3 & 4      | EO vs OWL   | <b>0.047</b>     | 0.076            |
| Messenteric | 3 & 4      | EO vs OWLM  | 0.585            | 0.661            |
| Messenteric | 3 & 4      | EO vs WC_G2 | 0.136            | 0.186            |
| Messenteric | 3 & 4      | EO vs WC_L2 | <b>0.001</b>     | <b>0.002</b>     |
| Retroperi   | 1 & 2      | all Groups  | <b>&lt;0.001</b> | <b>&lt;0.001</b> |
| Retroperi   | 1 & 2      | EO vs OWL   | <b>&lt;0.001</b> | <b>&lt;0.001</b> |
| Retroperi   | 1 & 2      | EO vs OWLM  | <b>0.023</b>     | <b>0.038</b>     |
| Retroperi   | 1 & 2      | EO vs WC_G1 | 0.339            | 0.417            |
| Retroperi   | 1 & 2      | EO vs WC_L1 | <b>&lt;0.001</b> | <b>&lt;0.001</b> |
| Retroperi   | 3 & 4      | all Groups  | <b>&lt;0.001</b> | <b>&lt;0.001</b> |
| Retroperi   | 3 & 4      | EO vs OWL   | <b>0.007</b>     | <b>0.014</b>     |
| Retroperi   | 3 & 4      | EO vs OWLM  | 0.686            | 0.762            |
| Retroperi   | 3 & 4      | EO vs WC_G2 | 0.183            | 0.241            |
| Retroperi   | 3 & 4      | EO vs WC_L2 | <b>0.001</b>     | <b>0.003</b>     |

\*Timepoint: T1=initial weight loss (WC-L1), T2=initial WC regain (WC-G1), T3=50% survival (~2 yrs of age, WC-G2), T4=subsequent WC weight loss (WC-L2)

**Table S3. Glucose and Hormones**

|             | Timepoint* | Group   |                  | Sex     |                  |
|-------------|------------|---------|------------------|---------|------------------|
|             |            | F-value | p-value          | F-value | p-value          |
| Glucose     | 1          | 2.50    | 0.075            | 7.54    | <b>0.010</b>     |
|             | 3          | 0.08    | 0.972            | 0.45    | 0.505            |
| Insulin†    | 1          | 8.96    | <b>&lt;0.001</b> | 20.11   | <b>&lt;0.001</b> |
|             | 3          | 2.33    | 0.091            | 0.87    | 0.356            |
| Adiponectin | 1          | 2.05    | 0.124            | 82.30   | <b>&lt;0.001</b> |
|             | 3          | 0.62    | 0.604            | 19.57   | <b>&lt;0.001</b> |
| Leptin      | 1          | 10.15   | <b>&lt;0.001</b> | 6.66    | <b>0.014</b>     |
|             | 3          | 2.90    | <b>0.049</b>     | 0.10    | 0.748            |

\*Timepoint: T1=initial weight loss, T3= 50% survival (~2 yrs of age)

†Insulin was log transformed before analysis to satisfy assumptions of Normality, with maximum level of detection at 10 ng/ml used for any value greater than the level of quantification.

**Table S4. Depot Specific Adipokine and Inflammatory Markers**

| Variable (mRNA AU)§ | Tissue   | Timepoint | F-statistic | p-value      | FDR   |
|---------------------|----------|-----------|-------------|--------------|-------|
| Adiponectin         | GONADAL  | T1        | 1.18        | 0.330        | 0.496 |
|                     |          | T3        | 2.88        | <b>0.049</b> | 0.157 |
|                     | INGUINAL | T1        | 3.32        | <b>0.031</b> | 0.151 |
|                     |          | T3        | 5.53        | <b>0.003</b> | 0.058 |
| Leptin              | GONADAL  | T1        | 4.27        | <b>0.011</b> | 0.094 |
|                     |          | T3        | 2.47        | 0.078        | 0.202 |
|                     | INGUINAL | T1        | 5.12        | <b>0.005</b> | 0.065 |
|                     |          | T3        | 4.73        | <b>0.007</b> | 0.077 |
| CD68                | GONADAL  | T1        | 3.48        | <b>0.026</b> | 0.156 |
|                     |          | T3        | 1.01        | 0.398        | 0.544 |
|                     | INGUINAL | T1        | 0.53        | 0.668        | 0.744 |
|                     |          | T3        | 2.27        | 0.098        | 0.225 |
| IL_6                | GONADAL  | T1        | 1.65        | 0.196        | 0.335 |
|                     |          | T3        | 1.74        | 0.177        | 0.336 |
|                     | INGUINAL | T1        | 0.48        | 0.696        | 0.744 |
|                     |          | T3        | 1.92        | 0.145        | 0.319 |
| PAI_1               | GONADAL  | T1        | 0.28        | 0.841        | 0.872 |
|                     |          | T3        | 2.32        | 0.093        | 0.208 |
|                     | INGUINAL | T1        | 1.17        | 0.335        | 0.488 |
|                     |          | T3        | 1.99        | 0.134        | 0.288 |
| Ppar                | GONADAL  | T1        | 0.55        | 0.652        | 0.734 |
|                     |          | T3        | 1.79        | 0.167        | 0.327 |
|                     | INGUINAL | T1        | 3.92        | <b>0.016</b> | 0.126 |
|                     |          | T3        | 5.06        | <b>0.005</b> | 0.062 |
| TGfb1               | GONADAL  | T1        | 2.34        | 0.090        | 0.221 |
|                     |          | T3        | 1.36        | 0.270        | 0.411 |
|                     | INGUINAL | T1        | 3.07        | <b>0.040</b> | 0.156 |
|                     |          | T3        | 3.50        | <b>0.025</b> | 0.162 |
| TNFalpha            | GONADAL  | T1        | 1.73        | 0.179        | 0.328 |
|                     |          | T3        | 3.68        | <b>0.021</b> | 0.142 |
|                     | INGUINAL | T1        | 2.63        | 0.065        | 0.196 |
|                     |          | T3        | 2.48        | 0.077        | 0.203 |
| Ppia                | GONADAL  | T1        | 1.07        | 0.374        | 0.518 |
|                     |          | T3        | 0.21        | 0.885        | 0.894 |
|                     | INGUINAL | T1        | 3.03        | <b>0.042</b> | 0.157 |
|                     |          | T3        | 0.71        | 0.551        | 0.676 |

§mRNA AU - messenger RNA normalized to single gene, reported as arbitrary units (AU)

\*Timepoint: T1=initial weight loss, T2=initial WC regain, T3=50% survival (~2 yrs of age),

T4=subsequent WC weight loss

**Table S5. Lifespan summary statistics (in days) by sex and diet group.**

| <b>Gender</b>  | <b>Group</b> | <b>N</b> | <b>mean</b> | <b>std</b> | <b>median</b> | <b>min</b> | <b>max</b> |
|----------------|--------------|----------|-------------|------------|---------------|------------|------------|
| Male           | EO           | 66       | 644.8       | 143.4      | 634.5         | 384        | 958        |
|                | OWLM         | 132      | 735.3       | 164.5      | 707.5         | 367        | 1151       |
|                | OWL          | 66       | 792.9       | 167.2      | 787.0         | 340        | 1047       |
|                | WC           | 138      | 703.8       | 147.6      | 702.0         | 402        | 1086       |
| Female         | EO           | 25       | 610.5       | 134.7      | 588.0         | 425        | 952        |
|                | OWLM         | 48       | 723.0       | 158.6      | 723.0         | 385        | 1050       |
|                | OWL          | 26       | 744.8       | 204.4      | 741.5         | 322        | 1126       |
|                | WC           | 51       | 742.2       | 179.6      | 725.0         | 343        | 1049       |
| Males & Female | EO           | 91       | 635.4       | 141.2      | 630.0         | 384        | 958        |
|                | OWLM         | 180      | 732.0       | 162.6      | 711.0         | 367        | 1151       |
|                | OWL          | 92       | 779.3       | 178.7      | 778.5         | 322        | 1126       |
|                | WC           | 189      | 714.2       | 157.3      | 705.0         | 343        | 1086       |
| Males & Female | All          | 552      | 717.86      | 165.48     | 705.0         | 322        | 1151       |

**Table S6. Survival Analysis (All Cause Mortality)**

| data   | predictor  | Linear model |                     | Survival model (Cox PH) |                   |
|--------|------------|--------------|---------------------|-------------------------|-------------------|
|        |            | F-stat       | p-value             | HR                      | p-value           |
| wave 1 | group      | 5.54         | <b>0.0010</b>       |                         | <b>&lt; 0.001</b> |
|        | EO vs OWL  | 3.65 *       | <b>0.002 †</b>      | 0.44                    | <b>&lt; 0.001</b> |
|        | EO vs OWLM | 3.52 *       | <b>0.003 †</b>      | 0.53                    | <b>&lt; 0.001</b> |
|        | EO vs WC   | 2.43 *       | <b>0.092 †</b>      | 0.63                    | <b>0.0090</b>     |
|        | OWLM vs WC | 1.41 *       | 0.666 †             | 0.82                    | 0.186             |
| wave2  | group      | 9.24         | <b>&lt; 0.001</b>   |                         | <b>&lt; 0.001</b> |
|        | EO vs OWL  | 5.26 *       | <b>&lt; 0.001 †</b> | 0.32                    | <b>&lt; 0.001</b> |
|        | EO vs OWLM | 3.13 *       | <b>0.012 †</b>      | 0.49                    | <b>&lt; 0.001</b> |
|        | EO vs WC   | 3.2 *        | <b>0.009 †</b>      | 0.52                    | <b>&lt; 0.001</b> |
|        | OWLM vs WC | 0.1 *        | 1.000 †             | 0.93                    | 0.6450            |

*Using all animals without censoring*

*† corrected for multiple comparison using Sidak*

*\* t-statistic*

Table S7. Survival Analysis Considering Cause of Death with Censoring

| data                                              | predictor  | Linear model |         | survival model (Cox PH) |         |
|---------------------------------------------------|------------|--------------|---------|-------------------------|---------|
|                                                   |            | F-stat       | p-value | HR                      | p-value |
| <b>Model 1 - Technical complications censored</b> |            |              |         |                         |         |
| wave 1                                            | group      | 6.10         | <0.001  |                         | <0.001  |
|                                                   | EO vs OWL  | 3.88*        | <0.001  | 0.43                    | <0.001  |
|                                                   | EO vs OWLM | 3.67*        | <0.001  | 0.52                    | <0.001  |
|                                                   | EO vs WC   | 2.72*        | 0.007   | 0.59                    | 0.003   |
| wave2                                             | group      | 9.31         | <0.001  |                         | <0.001  |
|                                                   | EO vs OWL  | 5.28*        | <0.001  | 0.32                    | <0.001  |
|                                                   | EO vs OWLM | 3.24*        | 0.001   | 0.48                    | <0.001  |
|                                                   | EO vs WC   | 3.26*        | 0.001   | 0.51                    | <0.001  |
| wave 1&2                                          | group      | 14.00        | <0.001  |                         | <0.001  |
|                                                   | EO vs OWL  | 6.29*        | <0.001  | 0.37                    | <0.001  |
|                                                   | EO vs OWLM | 4.88*        | <0.001  | 0.50                    | <0.001  |
|                                                   | EO vs WC   | 4.17*        | <0.001  | 0.55                    | <0.001  |

**Model 2 - Technical complications and euthanized for reasons other than ulcerative dermatitis censored**

|          |            |       |        |      |        |
|----------|------------|-------|--------|------|--------|
| wave 1   | group      | 5.81  | <0.001 |      | <0.001 |
|          | EO vs OWL  | 3.54* | <0.001 | 0.41 | <0.001 |
|          | EO vs OWLM | 3.47* | <0.001 | 0.56 | 0.003  |
|          | EO vs WC   | 1.84* | 0.068  | 0.63 | 0.015  |
| wave2    | group      | 8.25  | <0.001 |      | <0.001 |
|          | EO vs OWL  | 4.95* | <0.001 | 0.31 | <0.001 |
|          | EO vs OWLM | 3.25* | 0.001  | 0.49 | <0.001 |
|          | EO vs WC   | 3.11* | 0.002  | 0.49 | <0.001 |
| wave 1&2 | group      | 12.74 | <0.001 |      | <0.001 |
|          | EO vs OWL  | 5.86* | <0.001 | 0.35 | <0.001 |
|          | EO vs OWLM | 4.76* | <0.001 | 0.52 | <0.001 |
|          | EO vs WC   | 3.39* | <0.001 | 0.55 | <0.001 |

**Model 3 - All causes of death except 'found dead' censored**

|          |            |       |        |      |        |
|----------|------------|-------|--------|------|--------|
| wave 1   | group      | 2.43  | 0.070  |      | 0.14   |
|          | EO vs OWL  | 2.48* | 0.015  | 0.43 | 0.02   |
|          | EO vs OWLM | 2.35* | 0.021  | 0.56 | 0.07   |
|          | EO vs WC   | 1.74* | 0.085  | 0.62 | 0.14   |
| wave2    | group      | 4.37  | 0.006  |      | <0.001 |
|          | EO vs OWL  | 3.42* | <0.001 | 0.18 | <0.001 |
|          | EO vs OWLM | 2.35* | 0.020  | 0.34 | <0.001 |
|          | EO vs WC   | 2.64* | 0.009  | 0.28 | <0.001 |
| wave 1&2 | group      | 6.16  | 0.001  |      | <0.001 |
|          | EO vs OWL  | 4.08* | <0.001 | 0.26 | <0.001 |
|          | EO vs OWLM | 3.38* | <0.001 | 0.41 | <0.001 |
|          | EO vs WC   | 3.01* | 0.003  | 0.39 | <0.001 |

\* t-statistic

**Table S8. Correlation between 'age at max weight' and lifespan.**

| <b>Group</b> | <b>Sex</b> | <b>15 weeks post-randomization</b> | <b>p-value</b> |
|--------------|------------|------------------------------------|----------------|
| EO           | Male       | 0.85                               | <0.001         |
|              | Female     | 0.92                               | <0.001         |
|              | both       | 0.87                               | <0.001         |
| OWL          | Male       | 0.57                               | <0.001         |
|              | Female     | 0.48                               | 0.024          |
|              | both       | 0.54                               | <0.001         |
| OWLM         | Male       | 0.75                               | <0.001         |
|              | Female     | 0.69                               | <0.001         |
|              | both       | 0.74                               | <0.001         |
| WC           | Male       | 0.77                               | <0.001         |
|              | Female     | 0.85                               | <0.001         |
|              | both       | 0.80                               | <0.001         |

***Maximum weight was considered between 15 weeks post-randomization and observed death of an animal.***



**Table S9. Serum Cytokines.**

| Cytokine | Timepoint <sup>*</sup> | F-value | p-value      | FDR          |
|----------|------------------------|---------|--------------|--------------|
| IFN_γ    | 1                      | 1.69    | 0.187        | 0.481        |
| IFN_γ    | 3                      | 0.46    | 0.714        | 0.803        |
| IL_10    | 1                      | 2.41    | 0.083        | 0.748        |
| IL_10    | 3                      | 0.67    | 0.574        | 0.737        |
| IL_1B    | 1                      | 1.81    | 0.163        | 0.490        |
| IL_1B    | 3                      | 0.72    | 0.547        | 0.758        |
| IL_2     | 1                      | 1.04    | 0.387        | 0.775        |
| IL_2     | 3                      | 0.33    | 0.804        | 0.804        |
| IL_5     | 1                      | 1.96    | 0.138        | 0.620        |
| IL_5     | 3                      | 1.38    | 0.264        | 0.595        |
| IL_6     | 1                      | 1.94    | 0.141        | 0.508        |
| IL_6     | 3                      | 0.35    | 0.787        | 0.833        |
| TNF_α    | 1                      | 2.30    | 0.094        | 0.566        |
| TNF_α    | 3                      | 0.67    | 0.579        | 0.695        |
| KC_GRO   | 1                      | 5.60    | <b>0.003</b> | <b>0.054</b> |
| KC_GRO   | 3                      | 0.76    | 0.526        | 0.788        |

\*Timepoint: T1=initial weight loss, T3= 50% survival (~2 yrs of age)

**Table S10. Benchmark body weight of male and female C57BL/6J mice<sup>‡</sup> fed D12450B diet *ad libitum* .**

| Age<br>(weeks) | Male  |      | Female |      |
|----------------|-------|------|--------|------|
|                | Mean  | SD   | Mean   | SD   |
| 51             | 34.68 | 3.51 | 24.32  | 1.37 |
| 55             | 35.86 | 3.85 | 24.89  | 1.62 |
| 59             | 35.95 | 3.64 | 25.10  | 1.66 |
| 63             | 36.61 | 3.38 | 25.40  | 1.51 |
| 67             | 38.03 | 3.36 | 26.07  | 1.67 |
| 71             | 39.22 | 3.73 | 26.20  | 2.35 |
| 75             | 40.15 | 3.81 | 27.17  | 2.64 |
| 79             | 40.19 | 4.10 | 27.44  | 3.12 |
| 83             | 40.26 | 3.73 | 28.11  | 3.32 |
| 87             | 40.93 | 4.26 | 27.65  | 3.29 |
| 91             | 39.81 | 5.26 | 27.67  | 2.96 |
| 95             | 39.57 | 4.70 | 28.73  | 3.49 |
| 99             | 38.25 | 4.17 | 27.75  | 2.75 |
| 103            | 39.14 | 4.37 | 27.87  | 3.78 |
| 107            | 38.32 | 4.71 | 28.84  | 5.16 |
| 111            | 38.43 | 2.85 | 30.36  | 5.63 |
| 115            | 35.82 | 3.10 | 29.92  | 5.01 |
| 119            | 36.45 | 4.09 | 29.25  | 5.13 |
| 123            | 33.25 | 4.63 | 28.16  | 5.06 |
| 127            | 34.45 | 2.41 | 27.64  | 4.61 |
| 131            | 32.56 | n.a. | 25.87  | 4.27 |

<sup>‡</sup> n=15/sex at study initiation
